# Supplementary material
Source: PubMed Central journal article supplement (PMC5407496)
Supplement: NIHMS844656-supplement-1.pdf [file NIHMS844656-supplement-1.pdf]

Farren *et al.* Supplemental Figure 1

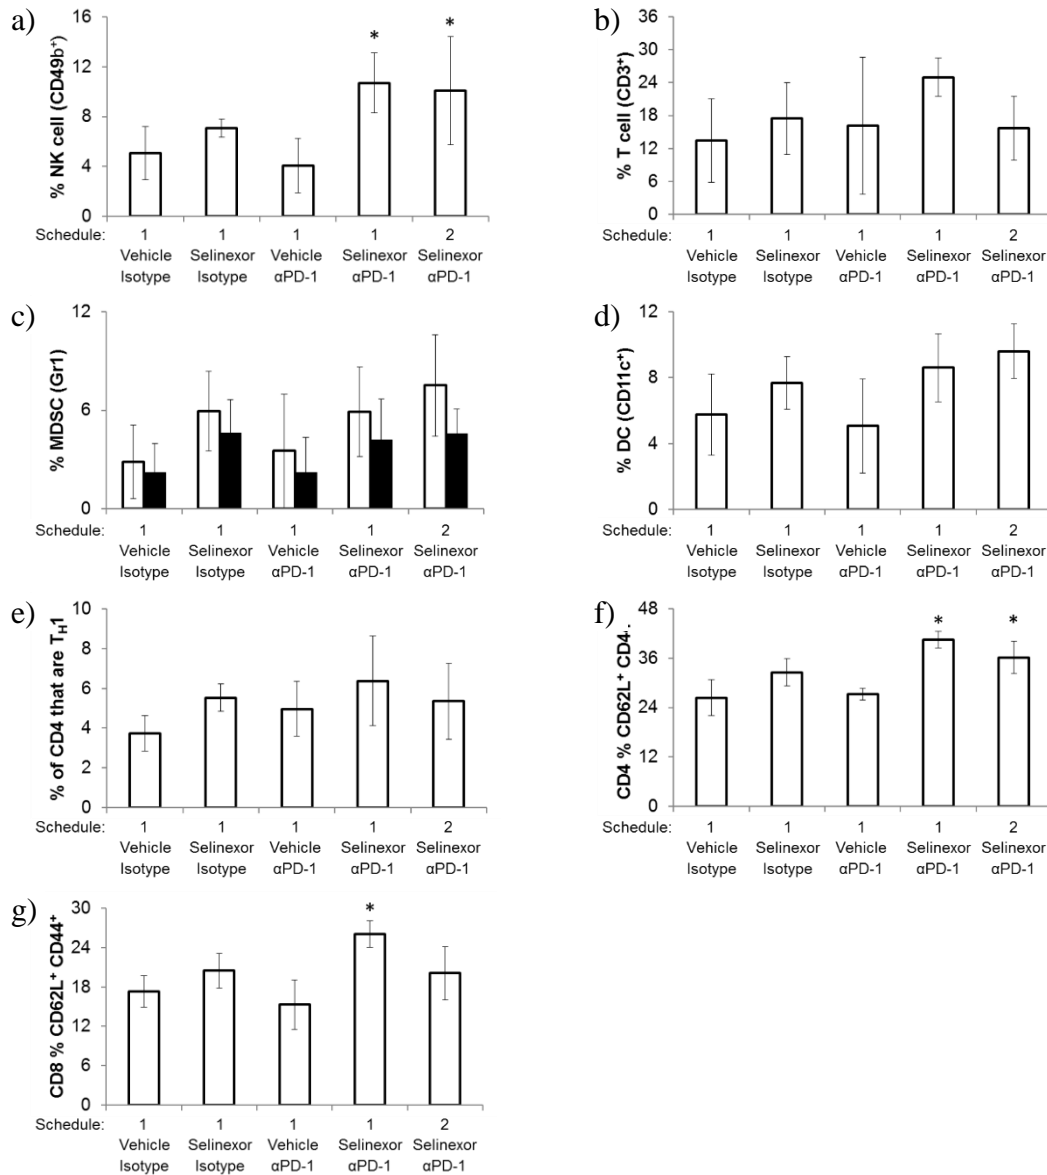

**Supplemental figure S1: Effects of alternative dosing schedules for selinexor (15 mg/kg)**

**and anti-PD-1 on systemic immune populations.** The frequency of splenic immune cell subsets was determined by flow cytometry, following the gating strategies described in Fig. 3 and Fig. 4. (a) NK cell frequency, (b) T cell frequency, (c) MDSC frequency, (d) DC frequency, (e) percentage of cells with T<sub>H1</sub> phenotype (CD4<sup>+</sup> CCR6<sup>-</sup> CXCR3<sup>+</sup> CCR4<sup>-</sup>) among splenic CD4<sup>+</sup> T cells, (f & g) percentage of CD4<sup>+</sup> T cells (f) or CD8<sup>+</sup> T cells (g) with an early activated/central memory phenotype (CD62L<sup>+</sup> CD44<sup>+</sup>). n=4-5 mice per group, (h); Mean ± S.D.; \*, p<0.05 as compared to vehicle + isotype control in Turkey HSD post-hoc test following ANOVA p<0.05.

## Farren *et al.* Supplemental Figure 2

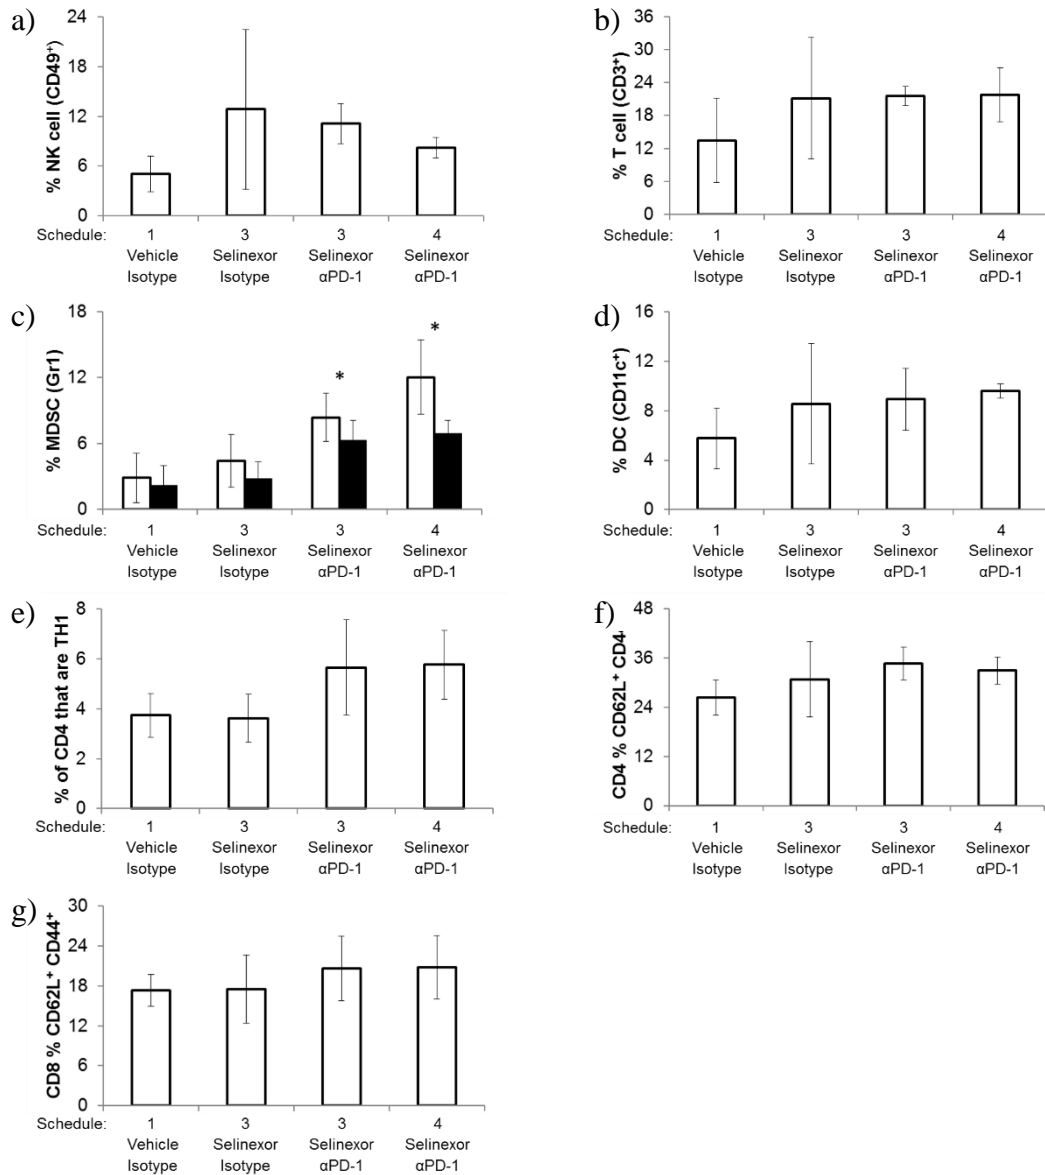

### Supplemental figure S2: Effects of alternative dosing schedules for selinexor (10 mg/kg)

**and anti-PD-1 on systemic immune populations.** The frequency of splenic immune cell subsets was determined by flow cytometry, following the gating strategies described in Fig. 3 and Fig. 4. (a) NK cell frequency, (b) T cell frequency, (c) MDSC frequency, (d) DC frequency, (e) percentage of cells with TH1 phenotype (CD4<sup>+</sup> CCR6<sup>-</sup> CXCR3<sup>+</sup> CCR4<sup>-</sup>) among splenic CD4<sup>+</sup> T cells, (f & g) percentage of CD4<sup>+</sup> T cells (f) or CD8<sup>+</sup> T cells (g) with an early activated/central memory phenotype (CD62L<sup>+</sup> CD44<sup>+</sup>). n=4-5 mice per group; Mean  $\pm$  S.D.; \*, p < 0.05 as compared to vehicle + isotype control in Turkey HSD post-hoc test following ANOVA p < 0.05.
